# Supplementary material
Source: MDPI journal article supplement (https://www.mdpi.com/1999-4907/13/11/1860)
Supplement: s1 [file s1]

## Article

# Differential Response of Soil Respiration and Total Belowground Carbon Allocation to Simulated Nitrogen and Phosphorus Deposition in Moso Bamboo Forests

Jingji Li <sup>1,2</sup>, Zhihan Yang <sup>3</sup>, Xiaolu Tang <sup>1,2,4,\*</sup>, Liang Liu <sup>3</sup>, Yunsen Lai <sup>3</sup>, Junjie Lei <sup>3</sup>, Changli Zeng <sup>1</sup>, Xinshan Ma <sup>1</sup>, Manyi Du <sup>5</sup>, Chunju Cai <sup>6</sup> and Shaohui Fan <sup>6,\*</sup>

<sup>1</sup> College of Ecology and Environment, Chengdu University of Technology, Chengdu 610059, China

<sup>2</sup> State Key Laboratory of Geohazard Prevention and Geoenvironment Protection, Chengdu University of Technology, Chengdu 610059, China

<sup>3</sup> College of Earth Science, Chengdu University of Technology, Chengdu 610059, China

<sup>4</sup> State Environmental Protection Key Laboratory of Synergetic Control and Joint Remediation for Soil & Water Pollution, Chengdu University of Technology, Chengdu 610059, China

<sup>5</sup> Experimental Center of Forestry in North China, Chinese Academy of Forestry, Beijing 102300, China

<sup>6</sup> Key Laboratory of Bamboo and Rattan, International Centre for Bamboo and Rattan, Beijing 100102, China

\* Correspondence: tangxiaolu17@cdut.edu.cn (X.T.); fansh@icbr.ac.cn (S.F.)

**Table S1.** Coefficients of the models between soil respiration (RS,  $\mu\text{mol CO}_2 \text{ m}^{-2} \text{ s}^{-1}$ ), autotrophic respiration (RA,  $\mu\text{mol CO}_2 \text{ m}^{-2} \text{ s}^{-1}$ ), heterotrophic respiration (RH,  $\mu\text{mol CO}_2 \text{ m}^{-2} \text{ s}^{-1}$ ) and soil moisture (SM, %) at 5 cm depth.

| Model           | Coefficients   | RS    |       |        |         | RA     |        |       |         | RH    |       |        |         |
|-----------------|----------------|-------|-------|--------|---------|--------|--------|-------|---------|-------|-------|--------|---------|
|                 |                | N100  | NP0   | P50    | N100P50 | N100   | NP0    | P50   | N100P50 | N100  | NP0   | P50    | N100P50 |
| RS = a + b × SM | a              | 1.599 | 1.877 | 2.376  | 2.221   | 1.102  | 1.196  | 0.315 | 0.872   | 0.800 | 0.364 | -0.174 | 1.521   |
|                 | b              | 0.026 | 0.011 | -0.008 | -0.008  | -0.009 | -0.005 | 0.033 | -0.008  | 0.017 | 0.024 | 0.061  | -0.008  |
|                 | R <sup>2</sup> | 0.011 | 0.003 | 0.002  | 0.001   | 0.003  | 0.001  | 0.078 | 0.007   | 0.016 | 0.043 | 0.100  | 0.006   |

NP0: water addition without N and P deposition; N100: understory N deposition with 100 kg N ha<sup>-1</sup> year<sup>-1</sup>; P50: understory P deposition with 50 kg N ha<sup>-1</sup> year<sup>-1</sup>; N100P50: understory NP deposition with 100 kg N ha<sup>-1</sup> year<sup>-1</sup> and 50 kg P ha<sup>-1</sup> year<sup>-1</sup>.

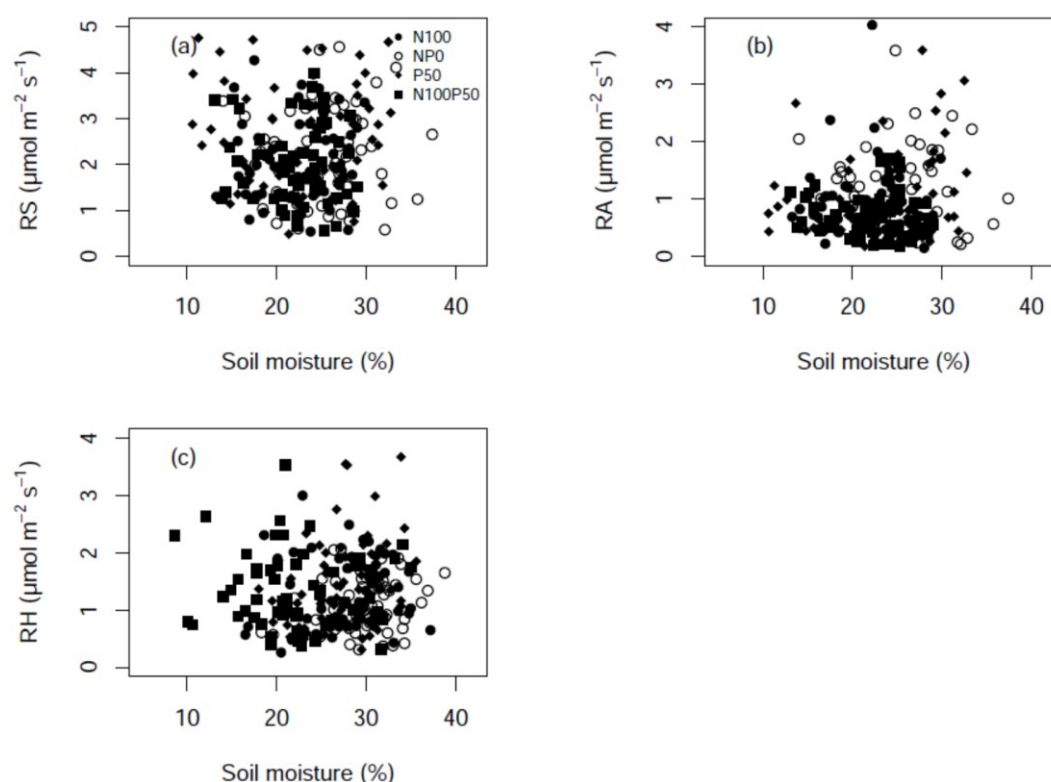

**Figure S1.** The correlations between total soil respiration (RS,  $\mu\text{mol CO}_2 \text{ m}^{-2} \text{ s}^{-1}$ ), autotrophic respiration (RA,  $\mu\text{mol CO}_2 \text{ m}^{-2} \text{ s}^{-1}$ ) and heterotrophic respiration (RH,  $\mu\text{mol CO}_2 \text{ m}^{-2} \text{ s}^{-1}$ ) and soil moisture (SM,  $^{\circ}\text{C}$ ) at 5 cm depth. NP0: water addition without N and P deposition; N100: understory N deposition with 100 kg N  $\text{ha}^{-1} \text{ year}^{-1}$ ; P50: understory P deposition with 50 kg N  $\text{ha}^{-1} \text{ year}^{-1}$ ; N100P50: understory NP deposition with 100 kg N  $\text{ha}^{-1} \text{ year}^{-1}$  and 50 kg P  $\text{ha}^{-1} \text{ year}^{-1}$ .

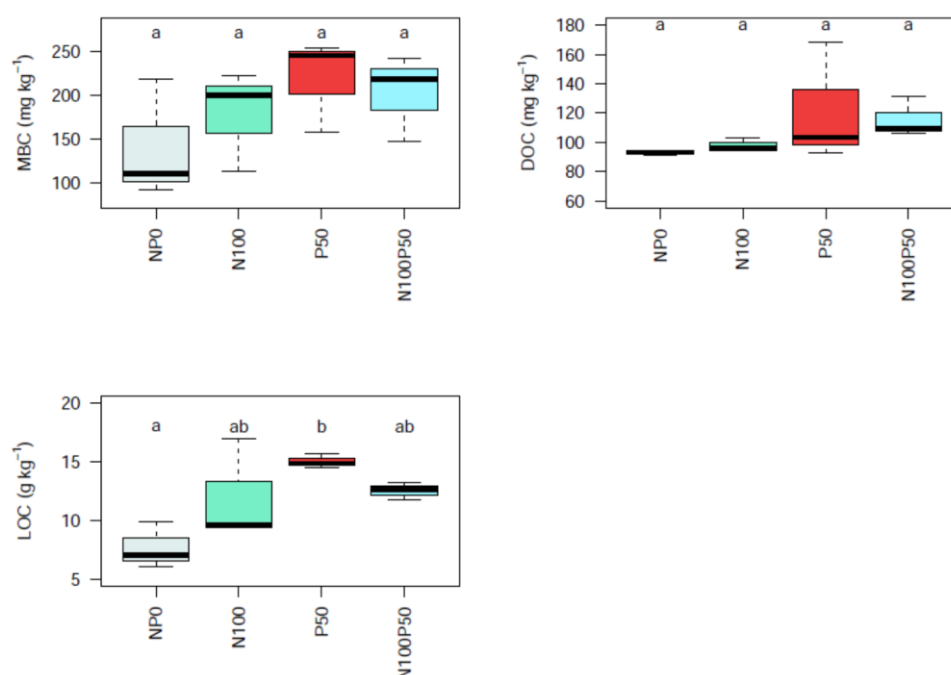

**Figure S2.** Boxplot of microbial biomass carbon (MBC), dissolved (DOC) and labile organic carbon (LOC) content under N or P or NP deposition. NP0: water addition without N and P deposition; N100: understory N deposition with 100 kg N  $\text{ha}^{-1} \text{ year}^{-1}$ ; P50: understory P deposition with 50 kg N  $\text{ha}^{-1} \text{ year}^{-1}$ ; N100P50: understory NP deposition with 100 kg N  $\text{ha}^{-1} \text{ year}^{-1}$  and 50 kg P  $\text{ha}^{-1} \text{ year}^{-1}$ . The same letter above the error bar mean non-significant difference at  $p = 0.05$ .

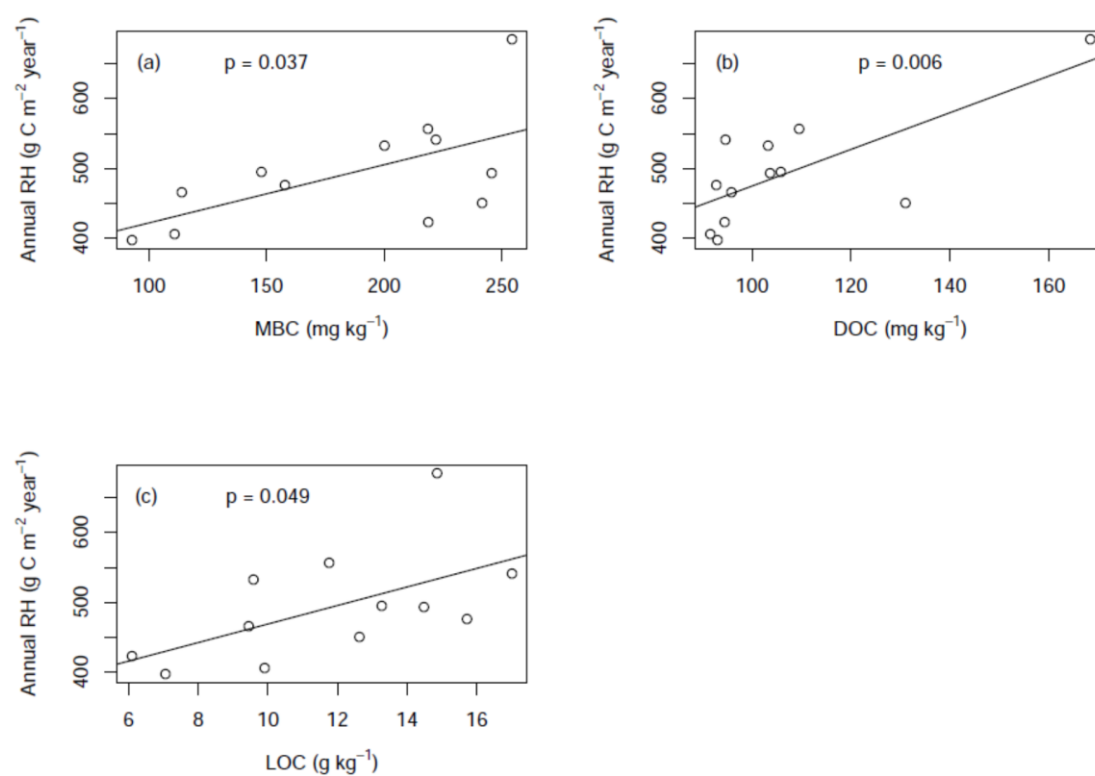

**Figure S3.** The correlations between soil heterotrophic respiration (RH) and microbial biomass carbon (MBC), dissolved (DOC) and labile organic carbon (LOC).
